# Supplementary material for: Unveiling Glucosinolate Diversity in Brassica Germplasm and In Silico Analysis for Determining Optimal Antioxidant Potential
Source: MDPI journal article supplement (doi:10.3390/antiox13030376), 2024-03-19
Supplement: s1 [file s1]

# Unveiling Glucosinolate Diversity in *Brassica* Germplasm and *In-silico* Analysis for Optimal Antioxidant Potential

Kanivalan Iwar <sup>1, †</sup>, Kebede Taye Desta<sup>1,2</sup>, Kingsley Ochar <sup>1,3</sup> and Seong-Hoon Kim <sup>1, †, \*</sup>

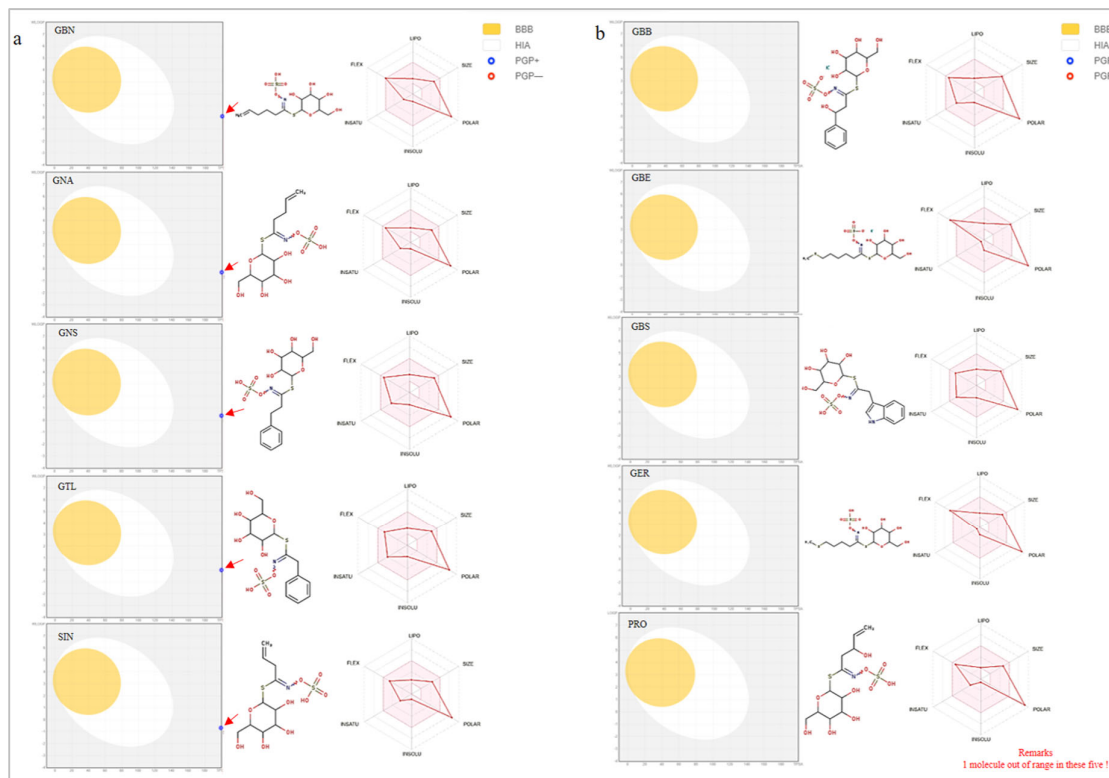

**Figure S1.** Egan graph illustrating the GSL structure with ADME properties of *Brassica* glucosinolates analyzed in SwissADME. a) GBN, GNA, GNS, GTL, and SIN are highlighted with PGP+ (arrow pointed), and b) GBB, GBE, GBS, GER, and PRO are noted with remarks indicating that one molecule is out of range in WLOGP and TPSA.

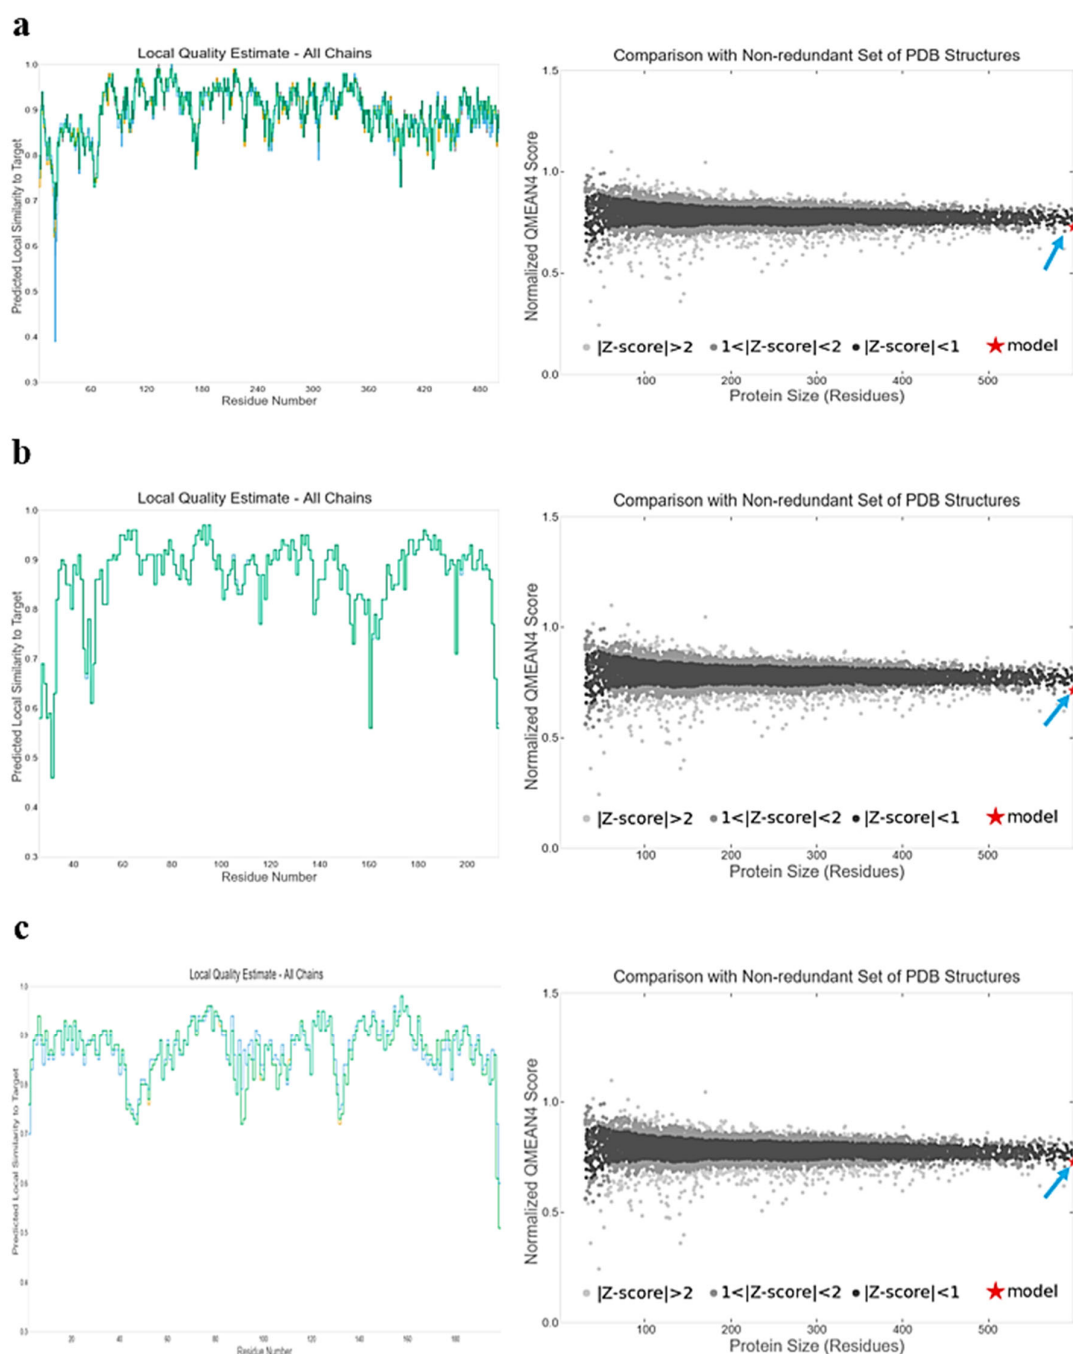

**Figure S2.** Homology-modeled target graphs of three proteins: a) Catalase (CAT), b) Glutathione peroxidase (GPX), and c) Superoxide dismutase (SOD). The figures include the QMEAN Disco and QMEAN graphs, with blue arrows indicating specific target points. Additionally, the protein residue dispersal is depicted row-wise for each target structure.

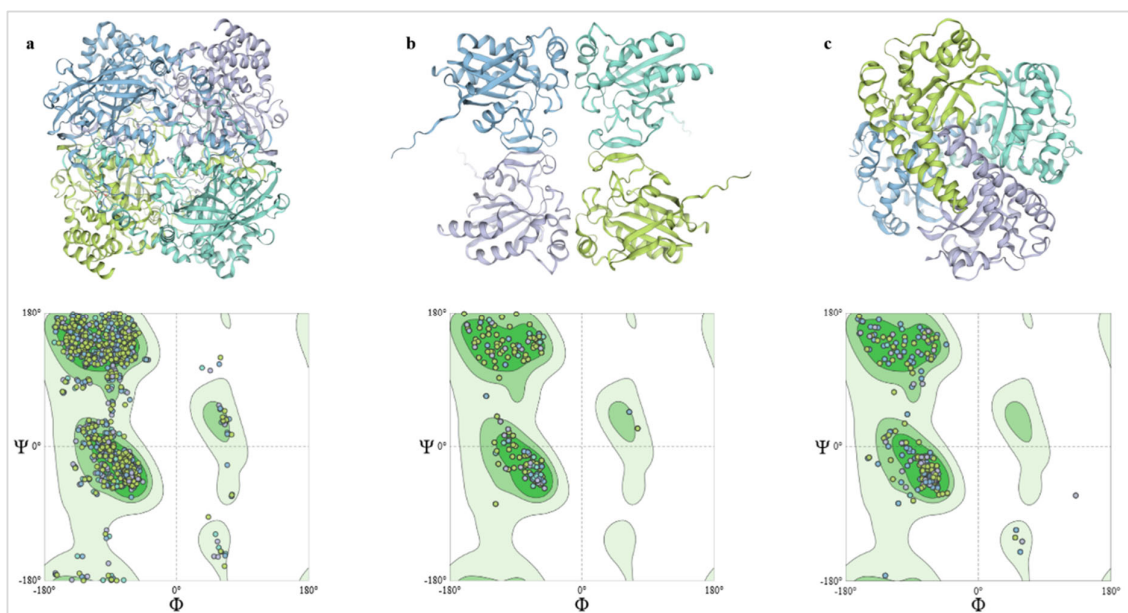

**Figure S3.** Displays the homology-modeled structures of three proteins: a) Catalase (CAT), b) Glutathione peroxidase (GPX), and c) Superoxide dismutase (SOD). These structures have undergone a Ramachandran Plot check using the SWISS-MODEL, ensuring the quality and reliability of the models

**Table S1.** *Brassica* germplasm used for Glucosinolates analysis.

| Sl. No. | IT No.  | <i>Brassica Species</i>                                            | Crop name       | Classifi-cation | Given Name            | Origin       |
|---------|---------|--------------------------------------------------------------------|-----------------|-----------------|-----------------------|--------------|
| 1.      | 339591  | <i>Brassica oleracea</i> var. <i>medullosa</i> Thell.              | Chou Moellier   | Cultivar        | U1                    | Uganda       |
| 2.      | K000507 | <i>Brassica rapa</i> subsp. <i>campestris</i> (L.) A.R.Clapham     | Wild Turnip     | Wild relative   | 8689                  | Italy        |
| 3.      | 100363  | <i>Brassica rapa</i> subsp. <i>narinosa</i> (L.H.Bailey) Hanelt    | Narinosa        | Landrace        | AVRDC-KJH-1985-100363 | Taiwan       |
| 4.      | 100394  | <i>Brassica rapa</i> subsp. <i>narinosa</i> (L.H.Bailey) Hanelt    | Nipposinica     | Landrace        | AVRDC-KJH-1985-100394 | Taiwan       |
| 5.      | 100410  | <i>Brassica rapa</i> subsp. <i>narinosa</i> (L.H.Bailey) Hanelt    | Narinosa        | Landrace        | AVRDC-KJH-1985-100410 | Taiwan       |
| 6.      | 228170  | <i>Brassica rapa</i> subsp. <i>narinosa</i> (L.H.Bailey) Hanelt    | Narinosa        | Landrace        | 99-2-9                | Taiwan       |
| 7.      | 293079  | <i>Brassica rapa</i> subsp. <i>narinosa</i> (L.H.Bailey) Hanelt    | Narinosa        | Landrace        | TAH TSAI              | Japan        |
| 8.      | 293390  | <i>Brassica rapa</i> subsp. <i>narinosa</i> (L.H.Bailey) Hanelt    | Narinosa        | Landrace        | Khe-ju-tatsai         | China        |
| 9.      | 306666  | <i>Brassica rapa</i> subsp. <i>narinosa</i> (L.H.Bailey) Hanelt    | Narinosa        | Landrace        | 110001 Chijimi Yukina | Japan        |
| 10.     | 100406  | <i>Brassica rapa</i> subsp. <i>nipposinica</i> (L.H.Bailey) Kitam. | nipposinica     | Landrace        | AVRDC-KJH-1985-100406 | Taiwan       |
| 11.     | 235637  | <i>Brassica rapa</i> subsp. <i>nipposinica</i> (L.H.Bailey) Kitam. | Nipposinica     | Cultivar        | CGN07213              | Japan        |
| 12.     | 235676  | <i>Brassica rapa</i> subsp. <i>nipposinica</i> (L.H.Bailey) Kitam. | Nipposinica     | Cultivar        | 040001 Sensuji Kyouna | Japan        |
| 13.     | 235677  | <i>Brassica rapa</i> subsp. <i>nipposinica</i> (L.H.Bailey) Kitam. | Nipposinica     | Cultivar        | 060002 Wase Mibuna    | Japan        |
| 14.     | 32730   | <i>Brassica rapa</i> subsp. <i>pekinensis</i> (Lour.) Kitam.       | Chinese cabbage | Cultivar        | Heonteun Baechu       | Korea, South |
| 15.     | 32731   | <i>Brassica rapa</i> subsp. <i>pekinensis</i> (Lour.) Kitam.       | Chinese cabbage | Cultivar        | Shimoyama chitose     | Japan        |
| 16.     | 32732   | <i>Brassica rapa</i> subsp. <i>pekinensis</i> (Lour.) Kitam.       | Chinese cabbage | Cultivar        | Nozaki No. 2          | Japan        |
| 17.     | 32733   | <i>Brassica rapa</i> subsp. <i>pekinensis</i> (Lour.) Kitam.       | Chinese cabbage | Cultivar        | Song Dao Xin 2        | China        |
| 18.     | 32735   | <i>Brassica rapa</i> subsp. <i>pekinensis</i> (Lour.) Kitam.       | Chinese cabbage | Cultivar        | August meat           | Korea, South |
| 19.     | 32736   | <i>Brassica rapa</i> subsp. <i>pekinensis</i> (Lour.) Kitam.       | Chinese cabbage | Cultivar        | Pyeonggangshin No. 1  | Korea, South |
| 20.     | 32737   | <i>Brassica rapa</i> subsp. <i>pekinensis</i> (Lour.) Kitam.       | Chinese cabbage | Cultivar        | Large rhythm          | Korea, South |
| 21.     | 32739   | <i>Brassica rapa</i> subsp. <i>pekinensis</i> (Lour.) Kitam.       | Chinese cabbage | Landrace        | Hotoren               | China        |
| 22.     | 32740   | <i>Brassica rapa</i> subsp. <i>pekinensis</i> (Lour.) Kitam.       | Chinese cabbage | Landrace        | Jia He                | China        |
| 23.     | 32741   | <i>Brassica rapa</i> subsp. <i>pekinensis</i> (Lour.) Kitam.       | Chinese cabbage | Cultivar        | Kyoto no.3            | Japan        |
| 24.     | 32742   | <i>Brassica rapa</i> subsp. <i>pekinensis</i> (Lour.) Kitam.       | Chinese cabbage | Cultivar        | Nozaki 2              | Japan        |
| 25.     | 32744   | <i>Brassica rapa</i> subsp. <i>pekinensis</i> (Lour.) Kitam.       | Chinese cabbage | Cultivar        | Harumakikyokuwase     | Japan        |
| 26.     | 32747   | <i>Brassica rapa</i> subsp. <i>pekinensis</i> (Lour.) Kitam.       | Chinese cabbage | Landrace        | Seoul                 | Korea, South |
| 27.     | 32748   | <i>Brassica rapa</i> subsp. <i>pekinensis</i> (Lour.) Kitam.       | Chinese cabbage | Landrace        | PI418957              | China        |
| 28.     | 32749   | <i>Brassica rapa</i> subsp. <i>pekinensis</i> (Lour.) Kitam.       | Chinese cabbage | Landrace        | PI418959              | China        |

|     |        |                                                              |                 |          |                        |              |
|-----|--------|--------------------------------------------------------------|-----------------|----------|------------------------|--------------|
| 29. | 32750  | <i>Brassica rapa</i> subsp. <i>pekinensis</i> (Lour.) Kitam. | Chinese cabbage | Cultivar | Ching Pao 26           | China        |
| 30. | 32751  | <i>Brassica rapa</i> subsp. <i>pekinensis</i> (Lour.) Kitam. | Chinese cabbage | landrace | Peking Hsiao Tsing Kou | China        |
| 31. | 100330 | <i>Brassica rapa</i> subsp. <i>pekinensis</i> (Lour.) Kitam. | Chinese cabbage | Cultivar | High-cold Summer       | Korea, South |
| 32. | 100331 | <i>Brassica rapa</i> subsp. <i>pekinensis</i> (Lour.) Kitam. | Chinese cabbage | Cultivar | Spring song            | Korea, South |
| 33. | 100332 | <i>Brassica rapa</i> subsp. <i>pekinensis</i> (Lour.) Kitam. | Chinese cabbage | Cultivar | Seventy-seven spoons   | Korea, South |
| 34. | 100333 | <i>Brassica rapa</i> subsp. <i>pekinensis</i> (Lour.) Kitam. | Chinese cabbage | Cultivar | Late Autumn 60 days    | Korea, South |
| 35. | 100334 | <i>Brassica rapa</i> subsp. <i>pekinensis</i> (Lour.) Kitam. | Chinese cabbage | Cultivar | Storage70days          | Korea, South |
| 36. | 100335 | <i>Brassica rapa</i> subsp. <i>pekinensis</i> (Lour.) Kitam. | Chinese cabbage | Cultivar | Sickness 60 days       | Korea, South |
| 37. | 100336 | <i>Brassica rapa</i> subsp. <i>pekinensis</i> (Lour.) Kitam. | Chinese cabbage | Cultivar | Struck                 | Korea, South |
| 38. | 100337 | <i>Brassica rapa</i> subsp. <i>pekinensis</i> (Lour.) Kitam. | Chinese cabbage | Cultivar | Strong large rhythm    | Korea, South |
| 39. | 100338 | <i>Brassica rapa</i> subsp. <i>pekinensis</i> (Lour.) Kitam. | Chinese cabbage | Cultivar | Sammi Garak            | Korea, South |
| 40. | 100339 | <i>Brassica rapa</i> subsp. <i>pekinensis</i> (Lour.) Kitam. | Chinese cabbage | Cultivar | Garakshin No.1         | Korea, South |
| 41. | 100340 | <i>Brassica rapa</i> subsp. <i>pekinensis</i> (Lour.) Kitam. | Chinese cabbage | Cultivar | Long storge            | Korea, South |
| 42. | 100341 | <i>Brassica rapa</i> subsp. <i>pekinensis</i> (Lour.) Kitam. | Chinese cabbage | Cultivar | Josaeng Rhythm         | Korea, South |
| 43. | 100342 | <i>Brassica rapa</i> subsp. <i>pekinensis</i> (Lour.) Kitam. | Chinese cabbage | Cultivar | Inner Bottle Rhythm    | Korea, South |
| 44. | 100343 | <i>Brassica rapa</i> subsp. <i>pekinensis</i> (Lour.) Kitam. | Chinese cabbage | Cultivar | Ideal Rhythm           | Korea, South |
| 45. | 100344 | <i>Brassica rapa</i> subsp. <i>pekinensis</i> (Lour.) Kitam. | Chinese cabbage | Cultivar | Early Spring           | Korea, South |
| 46. | 100345 | <i>Brassica rapa</i> subsp. <i>pekinensis</i> (Lour.) Kitam. | Chinese cabbage | Landrace | Seoul cabbage          | Korea, South |
| 47. | 100346 | <i>Brassica rapa</i> subsp. <i>pekinensis</i> (Lour.) Kitam. | Chinese cabbage | Cultivar | Artificial cabbage     | Korea, South |
| 48. | 100347 | <i>Brassica rapa</i> subsp. <i>pekinensis</i> (Lour.) Kitam. | Chinese cabbage | Cultivar | Bamboo shoot cabbage   | Korea, South |
| 49. | 100349 | <i>Brassica rapa</i> subsp. <i>pekinensis</i> (Lour.) Kitam. | Chinese cabbage | Landrace | AVRDC-KJH-1985-100349  | Taiwan       |
| 50. | 100350 | <i>Brassica rapa</i> subsp. <i>pekinensis</i> (Lour.) Kitam. | Chinese cabbage | Landrace | AVRDC-KJH-1985-100350  | Taiwan       |
| 51. | 100351 | <i>Brassica rapa</i> subsp. <i>pekinensis</i> (Lour.) Kitam. | Chinese cabbage | Landrace | AVRDC-KJH-1985-100351  | Taiwan       |
| 52. | 100352 | <i>Brassica rapa</i> subsp. <i>pekinensis</i> (Lour.) Kitam. | Chinese cabbage | Landrace | AVRDC-KJH-1985-100352  | Taiwan       |
| 53. | 100353 | <i>Brassica rapa</i> subsp. <i>pekinensis</i> (Lour.) Kitam. | Chinese cabbage | Landrace | AVRDC-KJH-1985-100353  | Taiwan       |
| 54. | 100354 | <i>Brassica rapa</i> subsp. <i>pekinensis</i> (Lour.) Kitam. | Chinese cabbage | Landrace | AVRDC-KJH-1985-100354  | Taiwan       |
| 55. | 100355 | <i>Brassica rapa</i> subsp. <i>pekinensis</i> (Lour.) Kitam. | Chinese cabbage | Landrace | AVRDC-KJH-1985-100355  | Taiwan       |
| 56. | 100356 | <i>Brassica rapa</i> subsp. <i>pekinensis</i> (Lour.) Kitam. | Chinese cabbage | Landrace | AVRDC-KJH-1985-100356  | Taiwan       |
| 57. | 100357 | <i>Brassica rapa</i> subsp. <i>pekinensis</i> (Lour.) Kitam. | Chinese cabbage | Landrace | AVRDC-KJH-1985-100357  | Taiwan       |
| 58. | 100358 | <i>Brassica rapa</i> subsp. <i>pekinensis</i> (Lour.) Kitam. | Chinese cabbage | Landrace | AVRDC-KJH-1985-100358  | Taiwan       |

|     |         |                                                              |                     |          |                             |              |
|-----|---------|--------------------------------------------------------------|---------------------|----------|-----------------------------|--------------|
| 59. | 100359  | <i>Brassica rapa</i> subsp. <i>pekinensis</i> (Lour.) Kitam. | Chinese cabbage     | Landrace | AVRDC-KJH-1985-100359       | Taiwan       |
| 60. | K022386 | <i>Brassica rapa</i> subsp. <i>pekinensis</i> (Lour.) Kitam. | Chinese cabbage     | Cultivar | Kang bing 3 hao qiucui wang | China        |
| 61. | K023958 | <i>Brassica rapa</i> subsp. <i>pekinensis</i> (Lour.) Kitam. | Chinese cabbage     | Cultivar | Person heart                | China        |
| 62. | K036310 | <i>Brassica rapa</i> subsp. <i>pekinensis</i> (Lour.) Kitam. | Chinese cabbage     | Landrace | DAK-SE                      | Korea, North |
| 63. | K037469 | <i>Brassica rapa</i> subsp. <i>pekinensis</i> (Lour.) Kitam. | Chinese cabbage     | Cultivar | Re kang wang 58 tian        | China        |
| 64. | K043728 | <i>Brassica rapa</i> subsp. <i>pekinensis</i> (Lour.) Kitam. | Chinese cabbage     | Landrace | Mostasa                     | Costa Rica   |
| 65. | K193859 | <i>Brassica rapa</i> subsp. <i>pekinensis</i> (Lour.) Kitam. | Chinese cabbage     | Cultivar | Wongyo No. 20037            | Korea, South |
| 66. | K243798 | <i>Brassica rapa</i> subsp. <i>pekinensis</i> (Lour.) Kitam. | Chinese cabbage     | Cultivar | KS 151                      | Thailand     |
| 67. | 804344  | <i>Brassica rapa</i> subsp. <i>rapa</i> L.                   | Turnip              | Landrace | IncheonGanghwa1998-983406   | Korea, South |
| 68. | 907305  | <i>Brassica rapa</i> subsp. <i>rapa</i> L.                   | Turnip              | Landrace | Moskovskij                  | Russia       |
| 69. | K002855 | <i>Brassica rapa</i> subsp. <i>rapa</i> L.                   | Turnip              | Landrace | MNG-KHH-2000-78             | Mongolia     |
| 70. | K037254 | <i>Brassica rapa</i> subsp. <i>rapa</i> L.                   | Turnip              | Landrace | New Late Komatsuna          | Japan        |
| 71. | K254291 | <i>Brassica rapa</i> subsp. <i>rapa</i> L.                   | Turnip              | Cultivar | Hua ye da man jing          | China        |
| 72. | K255223 | <i>Brassica rapa</i> subsp. <i>rapa</i> L.                   | Turnip              | Landrace | SD 3255                     | Korea, South |
| 73. | K255231 | <i>Brassica rapa</i> subsp. <i>rapa</i> L.                   | Turnip              | Landrace | SD 3271                     | Korea, South |
| 74. | K255356 | <i>Brassica rapa</i> subsp. <i>rapa</i> L.                   | Turnip              | Landrace | SD 3431                     | Korea, South |
| 75. | K257600 | <i>Brassica rapa</i> subsp. <i>rapa</i> L.                   | Turnip              | Landrace | GEO-PHJ-2016-15-19          | Georgia      |
| 76. | 119459  | <i>Brassica</i> sp.                                          | <i>Brassica</i> sp. | Landrace | PI311711                    | Chile        |
| 77. | 216479  | <i>Brassica</i> sp.                                          | <i>Brassica</i> sp. | Cultivar | Heat-mustard                | Unspecified  |
| 78. | 216480  | <i>Brassica</i> sp.                                          | <i>Brassica</i> sp. | Cultivar | Old Mustard                 | Unspecified  |
| 79. | 803359  | <i>Brassica</i> sp.                                          | <i>Brassica</i> sp. | Landrace | Mung choi                   | Unspecified  |
| 80. | K004273 | <i>Brassica</i> sp.                                          | <i>Brassica</i> sp. | Cultivar | Wirsing                     | Germany      |
| 81. | K018853 | <i>Brassica</i> sp.                                          | <i>Brassica</i> sp. | Landrace | WIR298                      | Unspecified  |
| 82. | K018856 | <i>Brassica</i> sp.                                          | <i>Brassica</i> sp. | Landrace | ASA DE CANTARO              | Spain        |
| 83. | K226915 | <i>Brassica</i> sp.                                          | <i>Brassica</i> sp. | Landrace | Vishegorskayauluchshennaya  | Vietnam      |
| 84. | K226916 | <i>Brassica</i> sp.                                          | <i>Brassica</i> sp. | Landrace | Sval of Victoria            | Sweden       |
| 85. | K226918 | <i>Brassica</i> sp.                                          | <i>Brassica</i> sp. | Landrace | Nz Grandmaster              | New Zealand  |
| 86. | K229552 | <i>Brassica</i> sp.                                          | <i>Brassica</i> sp. | Cultivar | PER-LYH-2013-1              | Peru         |

|     |         |                     |                     |          |                |      |
|-----|---------|---------------------|---------------------|----------|----------------|------|
| 87. | K229555 | <i>Brassica sp.</i> | <i>Brassica sp.</i> | Cultivar | PER-LYH-2013-4 | Peru |
| 88. | K229557 | <i>Brassica sp.</i> | <i>Brassica sp.</i> | Cultivar | PER-LYH-2013-6 | Peru |
| 89. | K229558 | <i>Brassica sp.</i> | <i>Brassica sp.</i> | Cultivar | PER-LYH-2013-7 | Peru |

**Table S2.** *Brassica* Glucosinolates quantity analysis

| Sample No. | IT No.  | Scientific name                                                 | SIN      | GNA      | GBN      | PRO      | GTL      | GER      | GNS      | GBE      | GBB      | GBS      |
|------------|---------|-----------------------------------------------------------------|----------|----------|----------|----------|----------|----------|----------|----------|----------|----------|
| 1.         | 339591  | <i>Brassica oleracea</i> var. <i>medullosa</i> Thell.           | 1648.65  | 98.60918 | 0.191017 | 159.3965 | 0.842697 | 2.520364 | 45.06257 | 0.493685 | 0        | 952.6867 |
| 2.         | K000507 | <i>Brassica rapa</i> subsp. <i>campestris</i> (L.) A.R.Clapham  | 6.018449 | 25027.2  | 5552.592 | 1370.853 | 9.054714 | 5.585607 | 228.2054 | 6.542671 | 2.25711  | 328.359  |
| 3.         | 100363  | <i>Brassica rapa</i> subsp. <i>narinosa</i> (L.H.Bailey) Hanelt | 10.06792 | 33049.23 | 3510.148 | 503.6124 | 9.140205 | 244.1044 | 417.1759 | 80.05511 | 51.41297 | 952.4496 |
| 4.         | 100394  | <i>Brassica rapa</i> subsp. <i>narinosa</i> (L.H.Bailey) Hanelt | 17.7065  | 13059.78 | 6027.519 | 1180.402 | 29.75818 | 65.42112 | 974.4683 | 344.3215 | 31.46682 | 1269.262 |
| 5.         | 100410  | <i>Brassica rapa</i> subsp. <i>narinosa</i> (L.H.Bailey) Hanelt | 1.803774 | 14800.57 | 3171.544 | 2256.432 | 10.5162  | 2888.747 | 715.6293 | 2287.308 | 10.95032 | 399.068  |
| 6.         | 228170  | <i>Brassica rapa</i> subsp. <i>narinosa</i> (L.H.Bailey) Hanelt | 9.612579 | 28780.31 | 2494.246 | 229.3948 | 3.591435 | 7.357058 | 290.3479 | 6.007654 | 33.25446 | 381.6054 |
| 7.         | 293079  | <i>Brassica rapa</i> subsp. <i>narinosa</i> (L.H.Bailey) Hanelt | 134.9702 | 26320.25 | 5928.834 | 349.9555 | 0.419313 | 1.088177 | 395.7977 | 0.269422 | 0        | 344.1843 |
| 8.         | 293390  | <i>Brassica rapa</i> subsp. <i>narinosa</i> (L.H.Bailey) Hanelt | 9.402096 | 12906.48 | 4848     | 2068.596 | 9.171145 | 6.077501 | 431.6096 | 39.17719 | 35.14676 | 475.3289 |
| 9.         | 306666  | <i>Brassica rapa</i> subsp. <i>narinosa</i> (L.H.Bailey) Hanelt | 8.003354 | 13086.28 | 6163.203 | 2047.693 | 5.66683  | 14.35192 | 622.6541 | 110.8664 | 10.32006 | 820.6429 |

|     |        |                                                                          |          |          |          |          |          |          |          |          |          |          |
|-----|--------|--------------------------------------------------------------------------|----------|----------|----------|----------|----------|----------|----------|----------|----------|----------|
| 10. | 100406 | <i>Brassica rapa</i> subsp.<br><i>nipposinica</i> (L.H.Bailey)<br>Kitam. | 0.394969 | 1790.217 | 343.3712 | 632.8642 | 6.224556 | 2203.825 | 560.7706 | 3217.829 | 33.14524 | 768.8473 |
| 11. | 235637 | <i>Brassica rapa</i> subsp.<br><i>nipposinica</i> (L.H.Bailey)<br>Kitam. | 6.171069 | 17545.24 | 2669.672 | 1662.31  | 2.901808 | 62.37011 | 431.1728 | 118.1737 | 3.030717 | 690.6473 |
| 12. | 235676 | <i>Brassica rapa</i> subsp.<br><i>nipposinica</i> (L.H.Bailey)<br>Kitam. | 12.72956 | 15199.2  | 6901.973 | 1170.514 | 5.534115 | 37.47964 | 1012.789 | 98.87868 | 56.00455 | 1210.792 |
| 13. | 235677 | <i>Brassica rapa</i> subsp.<br><i>nipposinica</i> (L.H.Bailey)<br>Kitam. | 15.16981 | 11681.84 | 5472.788 | 2682.207 | 9.906367 | 23.03045 | 1034.998 | 100.8037 | 70.19947 | 2098.265 |
| 14. | 32730  | <i>Brassica rapa</i> subsp.<br><i>pekinensis</i> (Lour.) Kitam.          | 0.379874 | 902.5799 | 2843.986 | 307.2265 | 25.69044 | 0.313958 | 236.2298 | 3.504784 | 76.8449  | 179.346  |
| 15. | 32731  | <i>Brassica rapa</i> subsp.<br><i>pekinensis</i> (Lour.) Kitam.          | 1.468344 | 1538.989 | 3639.522 | 711.3671 | 31.70249 | 0.671412 | 163.0862 | 2.726368 | 74.11225 | 72.89186 |
| 16. | 32732  | <i>Brassica rapa</i> subsp.<br><i>pekinensis</i> (Lour.) Kitam.          | 0.746331 | 2162.016 | 3525.455 | 376.0461 | 15.77512 | 1.649664 | 109.4789 | 10.15232 | 37.41373 | 695.0606 |
| 17. | 32733  | <i>Brassica rapa</i> subsp.<br><i>pekinensis</i> (Lour.) Kitam.          | 0.91153  | 1164.607 | 3090.866 | 551.3063 | 11.70168 | 1.013839 | 282.5336 | 8.977421 | 63.66022 | 229.8506 |
| 18. | 32735  | <i>Brassica rapa</i> subsp.<br><i>pekinensis</i> (Lour.) Kitam.          | 2.074633 | 632.7102 | 4301.165 | 640.7045 | 11.5828  | 0.445235 | 268.2527 | 2.267891 | 53.82328 | 268.44   |
| 19. | 32736  | <i>Brassica rapa</i> subsp.<br><i>pekinensis</i> (Lour.) Kitam.          | 2.818449 | 2230.411 | 8803.577 | 1082.342 | 21.57466 | 5.407671 | 773.649  | 168.2403 | 81.34092 | 600.1152 |
| 20. | 32737  | <i>Brassica rapa</i> subsp.<br><i>pekinensis</i> (Lour.) Kitam.          | 0.929979 | 914.8831 | 2952.501 | 940.3895 | 10.6937  | 3.943851 | 365.6183 | 43.35936 | 30.27076 | 236.492  |
| 21. | 32739  | <i>Brassica rapa</i> subsp.<br><i>pekinensis</i> (Lour.) Kitam.          | 1.515304 | 1913.69  | 2686.508 | 480.1995 | 17.49796 | 8.059312 | 168.4266 | 40.51206 | 32.81153 | 163.8662 |
| 22. | 32740  | <i>Brassica rapa</i> subsp.<br><i>pekinensis</i> (Lour.) Kitam.          | 0.524109 | 542.0345 | 711.6477 | 1867.709 | 14.15649 | 61.66153 | 323.1027 | 80.30769 | 28.30489 | 282.0342 |
| 23. | 32741  | <i>Brassica rapa</i> subsp.<br><i>pekinensis</i> (Lour.) Kitam.          | 0.537526 | 1100.804 | 954.6162 | 1332.673 | 11.70575 | 207.2867 | 476.3298 | 394.1707 | 18.86462 | 386.3322 |
| 24. | 32742  | <i>Brassica rapa</i> subsp.<br><i>pekinensis</i> (Lour.) Kitam.          | 8.277568 | 6815.379 | 4611.526 | 2294.977 | 16.12197 | 5.610123 | 598.9036 | 156.4516 | 38.03565 | 297.3014 |
| 25. | 32744  | <i>Brassica rapa</i> subsp.<br><i>pekinensis</i> (Lour.) Kitam.          | 3.242767 | 1905.886 | 6298.441 | 1021.716 | 13.69077 | 1.097667 | 477.0783 | 42.17834 | 59.64202 | 237.2486 |



|     |        |                                                                 |          |          |          |          |          |          |          |          |          |          |
|-----|--------|-----------------------------------------------------------------|----------|----------|----------|----------|----------|----------|----------|----------|----------|----------|
| 26. | 32747  | <i>Brassica rapa</i> subsp.<br><i>pekinensis</i> (Lour.) Kitam. | 1.093501 | 1393.914 | 2533.561 | 1837.94  | 4.190686 | 19.23764 | 190.9799 | 56.20742 | 59.22412 | 323.9866 |
| 27. | 32748  | <i>Brassica rapa</i> subsp.<br><i>pekinensis</i> (Lour.) Kitam. | 0.721174 | 769.3912 | 2107     | 829.5557 | 14.64419 | 90.88414 | 551.2208 | 581.1183 | 49.69511 | 461.803  |
| 28. | 32749  | <i>Brassica rapa</i> subsp.<br><i>pekinensis</i> (Lour.) Kitam. | 2.097275 | 3346.187 | 3760.559 | 1864.787 | 9.425175 | 80.21985 | 912.2416 | 186.5082 | 110.9534 | 723.3014 |
| 29. | 32750  | <i>Brassica rapa</i> subsp.<br><i>pekinensis</i> (Lour.) Kitam. | 4.079665 | 2690.869 | 2742.606 | 3056.381 | 4.938935 | 126.0688 | 788.6108 | 562.9613 | 102.5612 | 1160.682 |
| 30. | 32751  | <i>Brassica rapa</i> subsp.<br><i>pekinensis</i> (Lour.) Kitam. | 1.346751 | 2383.441 | 4299.402 | 986.3731 | 16.85149 | 4.260182 | 128.4699 | 31.88366 | 51.96739 | 1492.527 |
| 31. | 100330 | <i>Brassica rapa</i> subsp.<br><i>pekinensis</i> (Lour.) Kitam. | 1.047379 | 1392.97  | 2423.142 | 1466.038 | 16.25468 | 64.1985  | 391.856  | 735.3555 | 79.22108 | 633.369  |
| 32. | 100331 | <i>Brassica rapa</i> subsp.<br><i>pekinensis</i> (Lour.) Kitam. | 3.005451 | 1279.261 | 4587.398 | 1211.562 | 7.560658 | 7.67418  | 501.4136 | 170.0015 | 50.45355 | 1417.582 |
| 33. | 100332 | <i>Brassica rapa</i> subsp.<br><i>pekinensis</i> (Lour.) Kitam. | 1.055765 | 901.589  | 2427.623 | 2103.374 | 23.3545  | 48.28865 | 499.6686 | 793.6923 | 61.09822 | 1017.491 |
| 34. | 100333 | <i>Brassica rapa</i> subsp.<br><i>pekinensis</i> (Lour.) Kitam. | 2.045283 | 3413.014 | 4655.675 | 1291.729 | 21.92477 | 40.05694 | 300.8776 | 154.6445 | 57.98862 | 671.3363 |
| 35. | 100334 | <i>Brassica rapa</i> subsp.<br><i>pekinensis</i> (Lour.) Kitam. | 0.434382 | 586.406  | 1538.44  | 1130.378 | 17.18613 | 4.953737 | 176.2755 | 29.17107 | 20.83276 | 609.0673 |
| 36. | 100335 | <i>Brassica rapa</i> subsp.<br><i>pekinensis</i> (Lour.) Kitam. | 0.783229 | 2539.738 | 3250.222 | 817.4559 | 16.52825 | 16.76394 | 259.6497 | 85.28435 | 44.94956 | 686.5084 |
| 37. | 100336 | <i>Brassica rapa</i> subsp.<br><i>pekinensis</i> (Lour.) Kitam. | 0.71195  | 2031.888 | 2199.599 | 855.7867 | 13.71845 | 14.88652 | 302.3699 | 46.89476 | 61.27114 | 678.188  |
| 38. | 100337 | <i>Brassica rapa</i> subsp.<br><i>pekinensis</i> (Lour.) Kitam. | 0.651572 | 898.4208 | 1536.051 | 658.508  | 8.496173 | 11.09529 | 578.2157 | 29.94183 | 38.13728 | 338.1375 |
| 39. | 100338 | <i>Brassica rapa</i> subsp.<br><i>pekinensis</i> (Lour.) Kitam. | 0.612159 | 774.8956 | 2089.985 | 1028.815 | 6.28725  | 3.285884 | 293.0516 | 64.71259 | 53.62837 | 337.7978 |
| 40. | 100339 | <i>Brassica rapa</i> subsp.<br><i>pekinensis</i> (Lour.) Kitam. | 0.297694 | 620.5071 | 968.878  | 678.9454 | 5.519459 | 13.9913  | 320.0582 | 24.82817 | 17.3212  | 182.1665 |
| 41. | 100340 | <i>Brassica rapa</i> subsp.<br><i>pekinensis</i> (Lour.) Kitam. | 0.612998 | 1432.984 | 1736.294 | 874.5592 | 7.736525 | 3.6552   | 251.9181 | 16.02832 | 19.17406 | 141.7094 |
| 42. | 100341 | <i>Brassica rapa</i> subsp.<br><i>pekinensis</i> (Lour.) Kitam. | 0.463732 | 1149.304 | 1355.925 | 886.9885 | 6.528253 | 44.78766 | 577.0704 | 120.9713 | 21.25294 | 183.8811 |
| 43. | 100342 | <i>Brassica rapa</i> subsp.<br><i>pekinensis</i> (Lour.) Kitam. | 1.241929 | 1580.51  | 4505.046 | 689.441  | 12.78293 | 0.468169 | 373.379  | 2.152315 | 67.38794 | 769.589  |

|     |             |                                                                 |          |          |          |          |          |          |          |          |          |          |
|-----|-------------|-----------------------------------------------------------------|----------|----------|----------|----------|----------|----------|----------|----------|----------|----------|
| 44. | 100343      | <i>Brassica rapa</i> subsp.<br><i>pekinensis</i> (Lour.) Kitam. | 0.432704 | 1054.852 | 1932.658 | 756.5871 | 13.95538 | 1.925662 | 205.0382 | 15.65327 | 26.60523 | 479.4203 |
| 45. | 100344      | <i>Brassica rapa</i> subsp.<br><i>pekinensis</i> (Lour.) Kitam. | 0.982809 | 2242.99  | 2058.56  | 1433.753 | 13.51979 | 15.92962 | 350.2991 | 88.71336 | 69.97118 | 232.9275 |
| 46. | 100345      | <i>Brassica rapa</i> subsp.<br><i>pekinensis</i> (Lour.) Kitam. | 1.053249 | 951.664  | 1576.602 | 794.9024 | 5.357434 | 6.355081 | 279.5695 | 25.56831 | 11.57983 | 834.1888 |
| 47. | 100346      | <i>Brassica rapa</i> subsp.<br><i>pekinensis</i> (Lour.) Kitam. | 5.584906 | 6292.443 | 7778.249 | 3187.047 | 17.26592 | 10.29735 | 696.4431 | 242.9238 | 47.37429 | 1681.803 |
| 48. | 100347      | <i>Brassica rapa</i> subsp.<br><i>pekinensis</i> (Lour.) Kitam. | 1.875052 | 1999.402 | 4258.785 | 3377.309 | 7.607067 | 31.58244 | 856.5281 | 544.4432 | 109.008  | 328.5009 |
| 49. | 100349      | <i>Brassica rapa</i> subsp.<br><i>pekinensis</i> (Lour.) Kitam. | 2.212159 | 3644.613 | 4673.914 | 941.6744 | 20.06106 | 16.65876 | 202.473  | 309.8362 | 17.74061 | 928.1442 |
| 50. | 100350      | <i>Brassica rapa</i> subsp.<br><i>pekinensis</i> (Lour.) Kitam. | 3.687212 | 3917.649 | 5453.647 | 517.039  | 8.218531 | 4.744168 | 214.7139 | 72.9667  | 34.57869 | 683.1758 |
| 51. | 100351      | <i>Brassica rapa</i> subsp.<br><i>pekinensis</i> (Lour.) Kitam. | 1.897694 | 1451.094 | 849.5035 | 1816.655 | 17.42062 | 36.10281 | 343.6718 | 50.23345 | 3.189989 | 481.2932 |
| 52. | 100352      | <i>Brassica rapa</i> subsp.<br><i>pekinensis</i> (Lour.) Kitam. | 6.131656 | 9901.929 | 7422.057 | 3703.511 | 3.159095 | 52.66192 | 711.7418 | 479.9127 | 22.82139 | 194.8696 |
| 53. | 100353      | <i>Brassica rapa</i> subsp.<br><i>pekinensis</i> (Lour.) Kitam. | 12.7153  | 14332.27 | 9803.821 | 3446.871 | 4.833903 | 41.40767 | 1007.876 | 208.1309 | 37.87107 | 497.6685 |
| 54. | 100354      | <i>Brassica rapa</i> subsp.<br><i>pekinensis</i> (Lour.) Kitam. | 6.976939 | 12686.64 | 5182.537 | 8536.507 | 10.25566 | 127.6418 | 1258.672 | 627.814  | 150.6947 | 610.6436 |
| 55. | 100355      | <i>Brassica rapa</i> subsp.<br><i>pekinensis</i> (Lour.) Kitam. | 7.370231 | 23501.58 | 6743.375 | 2388.358 | 6.555121 | 9.699486 | 1188.585 | 61.67088 | 93.59954 | 648.7521 |
| 56. | 100356      | <i>Brassica rapa</i> subsp.<br><i>pekinensis</i> (Lour.) Kitam. | 3.490147 | 1175.522 | 5168.054 | 2991.745 | 40.77186 | 1.069197 | 736.3597 | 117.6096 | 53.64505 | 1134.857 |
| 57. | 100357      | <i>Brassica rapa</i> subsp.<br><i>pekinensis</i> (Lour.) Kitam. | 0.698532 | 1433.896 | 1966.314 | 1636.766 | 16.25631 | 16.70779 | 271.5931 | 111.057  | 39.2992  | 250.7507 |
| 58. | 100358      | <i>Brassica rapa</i> subsp.<br><i>pekinensis</i> (Lour.) Kitam. | 1.012159 | 1575.909 | 3312.058 | 1355.639 | 12.41492 | 5.699486 | 235.6372 | 74.66207 | 18.48237 | 800.524  |
| 59. | 100359      | <i>Brassica rapa</i> subsp.<br><i>pekinensis</i> (Lour.) Kitam. | 1.745912 | 2741.934 | 5347.337 | 2128.235 | 11.57548 | 3.648873 | 234.3959 | 77.28971 | 45.88017 | 269.3898 |
| 60. | K02238<br>6 | <i>Brassica rapa</i> subsp.<br><i>pekinensis</i> (Lour.) Kitam. | 19.99832 | 3033.265 | 6991.591 | 4140.329 | 0.858981 | 19.67023 | 1058.173 | 193.2882 | 0        | 825.6945 |
| 61. | K02395<br>8 | <i>Brassica rapa</i> subsp.<br><i>pekinensis</i> (Lour.) Kitam. | 0.362264 | 726.4176 | 1081.162 | 179.6268 | 0.79873  | 0.264927 | 295.5624 | 4.427095 | 2.78157  | 473.6529 |

|     |         |                                                              |          |          |          |          |          |          |          |          |          |          |
|-----|---------|--------------------------------------------------------------|----------|----------|----------|----------|----------|----------|----------|----------|----------|----------|
| 62. | K036310 | <i>Brassica rapa</i> subsp. <i>pekinensis</i> (Lour.) Kitam. | 9.553878 | 9845.84  | 6314.307 | 6736.526 | 0.552027 | 25.27244 | 1494.473 | 138.809  | 5.615472 | 1057.492 |
| 63. | K037469 | <i>Brassica rapa</i> subsp. <i>pekinensis</i> (Lour.) Kitam. | 14872.93 | 716.3373 | 0.228876 | 10.08903 | 4.944634 | 0.209569 | 385.5592 | 0.04822  | 5.953735 | 65.74062 |
| 64. | K043728 | <i>Brassica rapa</i> subsp. <i>pekinensis</i> (Lour.) Kitam. | 7.369392 | 5018.472 | 4286.92  | 231.439  | 1.465559 | 1.64571  | 228.4116 | 37.28052 | 0        | 112.4653 |
| 65. | K193859 | <i>Brassica rapa</i> subsp. <i>pekinensis</i> (Lour.) Kitam. | 1.314885 | 942.6852 | 992.4256 | 3748.225 | 0.919231 | 38.15184 | 576.4581 | 135.7497 | 3.258248 | 126.8272 |
| 66. | K243798 | <i>Brassica rapa</i> subsp. <i>pekinensis</i> (Lour.) Kitam. | 0.258281 | 51.75861 | 23.95113 | 406.8636 | 1.809966 | 728.2285 | 604.2794 | 607.3379 | 1.52901  | 255.5682 |
| 67. | 804344  | <i>Brassica rapa</i> subsp. <i>rapa</i> L.                   | 1.080084 | 1309.468 | 5094.115 | 712.8822 | 1.350757 | 0.661131 | 579.7804 | 20.11251 | 4.241183 | 28.07432 |
| 68. | 907305  | <i>Brassica rapa</i> subsp. <i>rapa</i> L.                   | 7.540461 | 2376.98  | 13.52349 | 9389.571 | 0.386745 | 137.8268 | 210.939  | 2.528129 | 0        | 340.987  |
| 69. | K002855 | <i>Brassica rapa</i> subsp. <i>rapa</i> L.                   | 10.15765 | 19649.24 | 5058.782 | 182.491  | 1.702491 | 18.57019 | 408.4069 | 52.13088 | 3.814562 | 201.9026 |
| 70. | K037254 | <i>Brassica rapa</i> subsp. <i>rapa</i> L.                   | 4.453669 | 1164.558 | 5061.402 | 2596.775 | 2.215437 | 3.246342 | 338.3613 | 108.1232 | 4.134243 | 477.6722 |
| 71. | K254291 | <i>Brassica rapa</i> subsp. <i>rapa</i> L.                   | 0.047799 | 159.7393 | 67.3576  | 718.9565 | 1.965478 | 505.9185 | 311.5238 | 456.7639 | 1.859689 | 219.3378 |
| 72. | K255223 | <i>Brassica rapa</i> subsp. <i>rapa</i> L.                   | 1.066667 | 748.4976 | 1241.307 | 2457.39  | 0.988438 | 21.73665 | 558.1826 | 138.6544 | 5.905954 | 253.1802 |
| 73. | K255231 | <i>Brassica rapa</i> subsp. <i>rapa</i> L.                   | 0.122432 | 195.1161 | 255.3941 | 839.4958 | 0.885035 | 498.087  | 404.7729 | 1176.204 | 2.998862 | 160.6845 |
| 74. | K255356 | <i>Brassica rapa</i> subsp. <i>rapa</i> L.                   | 0.090566 | 236.722  | 1.569437 | 282.1546 | 0.937144 | 2903.381 | 318.6919 | 602.4401 | 1.802806 | 67.36009 |
| 75. | K257600 | <i>Brassica rapa</i> subsp. <i>rapa</i> L.                   | 3.748428 | 3080.945 | 2510.028 | 7475.972 | 1.39391  | 230.6168 | 486.1165 | 186.421  | 71.63367 | 307.0858 |
| 76. | 119459  | <i>Brassica sp.</i>                                          | 11625.65 | 12640.75 | 48.49251 | 71.35764 | 3.804755 | 1.955714 | 750.6108 | 0.142365 | 5.828593 | 89.39279 |
| 77. | 216479  | <i>Brassica sp.</i>                                          | 12891.44 | 631.4605 | 11.21752 | 5.963876 | 3.196548 | 0.158165 | 320.8178 | 0        | 3.969662 | 72.7016  |
| 78. | 216480  | <i>Brassica sp.</i>                                          | 3.174004 | 7328.323 | 2729.139 | 739.2484 | 1.397981 | 53.22341 | 375.5317 | 109.318  | 2.52446  | 91.26273 |
| 79. | 803359  | <i>Brassica sp.</i>                                          | 3140.652 | 56.36851 | 0.081742 | 127.9815 | 0.950985 | 1.024911 | 54.15584 | 0        | 0.182025 | 1201.45  |
| 80. | K004273 | <i>Brassica sp.</i>                                          | 806.2843 | 1.539904 | 0.035278 | 23.33761 | 0.33545  | 0.627916 | 10.6769  | 0        | 0.150171 | 131.6291 |
| 81. | K018853 | <i>Brassica sp.</i>                                          | 54.47044 | 0.210677 | 0.074858 | 1.860983 | 0.304511 | 0.308422 | 3.478158 | 0        | 0.076223 | 350.5151 |

|     |             |                     |          |          |          |          |          |          |          |          |          |          |
|-----|-------------|---------------------|----------|----------|----------|----------|----------|----------|----------|----------|----------|----------|
| 82. | K01885<br>6 | <i>Brassica sp.</i> | 1.567296 | 2490.535 | 1358.166 | 579.7552 | 0.832926 | 36.74891 | 291.2342 | 277.2147 | 2.321957 | 81.56076 |
| 83. | K22691<br>5 | <i>Brassica sp.</i> | 3.896017 | 701.1891 | 1215.139 | 4757.329 | 1.655268 | 66.40965 | 346.0063 | 162.5121 | 3.354949 | 190.8614 |
| 84. | K22691<br>6 | <i>Brassica sp.</i> | 3.16478  | 739.5153 | 531.0601 | 3017.661 | 3.99772  | 11.03124 | 282.4132 | 27.36625 | 2.885097 | 183.1133 |
| 85. | K22691<br>8 | <i>Brassica sp.</i> | 14.30021 | 3961.048 | 911.6262 | 7196.256 | 0.76779  | 8.062475 | 375.464  | 18.76311 | 3.476678 | 223.6871 |
| 86. | K22955<br>2 | <i>Brassica sp.</i> | 5.887631 | 4853.182 | 6874.516 | 2620.685 | 2.436085 | 0.797153 | 552.8264 | 26.06659 | 4.657565 | 156.5656 |
| 87. | K22955<br>5 | <i>Brassica sp.</i> | 5.071698 | 4113.902 | 8344.06  | 1958.178 | 1.250611 | 0.764729 | 520.6738 | 16.53349 | 4.279863 | 275.1089 |
| 88. | K22955<br>7 | <i>Brassica sp.</i> | 6.667505 | 9800.753 | 3640.294 | 6172.12  | 1.656896 | 8.375643 | 301.072  | 20.32223 | 2.657565 | 331.8774 |
| 89. | K22955<br>8 | <i>Brassica sp.</i> | 8.345493 | 15988.03 | 5456.923 | 12780.49 | 1.419964 | 19.29854 | 632.2676 | 28.02755 | 6.4562   | 260.9417 |

**Table S3.** GSLs standards of the *Brassica* Germplasm.

| GSLs               | Mean     | Std Deviation | Sum       | Mini   | Median   | Maxi      | Sum of Squares | F value  |
|--------------------|----------|---------------|-----------|--------|----------|-----------|----------------|----------|
| Glucobarbarin      | 31.911   | 31.992        | 2840.122  | 0.027  | 22.821   | 150.694   | 6.520          | 945.291  |
| Glucoberteroin     | 210.236  | 449.220       | 18711     | 0.028  | 74.662   | 3217.829  | 1.650          | 238705.4 |
| Glucobrassicinapin | 3256.895 | 2402.876      | 289863.7  | 0.035  | 2843.986 | 9803.821  | 2.970          | 4307049  |
| Glucobrassicin     | 503.837  | 406.773       | 44841.540 | 28.074 | 340.987  | 2098.265  | 1.080          | 156286.2 |
| Glucoerucin        | 136.834  | 491.601       | 12178.300 | 0.158  | 11.095   | 2903.381  | 1.280          | 185201.6 |
| Gluconapin         | 5233.952 | 7244.347      | 465821.7  | 0.210  | 1913.690 | 33049.230 | 2.760          | 400007   |
| Gluconasturtiin    | 456.980  | 289.426       | 40671.220 | 3.478  | 375.464  | 1494.473  | 6.060          | 87755.46 |
| Glucotropaeolin    | 8.707    | 8.090         | 774.960   | 0.304  | 6.528    | 40.771    | 4.090          | 59.268   |
| Progoitrin         | 1902.956 | 2235.534      | 169363.1  | 1.860  | 1130.378 | 12780.490 | 1.940          | 2806722  |
| Sinigrin           | 511.179  | 2413.384      | 45494.970 | 0.047  | 2.212    | 14872.930 | 1.410          | 2052720  |

\*GSLs- Glucosinolates, Std Dev.- Standard Deviation, Mini -Minimum, Maxi- Maximum; significance  $p = 0$  ( $p \geq 0.05$ )

**Table S4.** ADME properties of *Brassica* glucosinolates.

[illegible]

|                     |                |       |      |       |      |       |       |       |       |        |       |
|---------------------|----------------|-------|------|-------|------|-------|-------|-------|-------|--------|-------|
|                     | P-gp substrate | No    | Yes  | Yes   | No   | Yes   | Yes   | Yes   | Yes   | Yes    | Yes   |
|                     | CYP inhibitors | 0     | 0    | 0     | 0    | 0     | 0     | 0     | 0     | 0      | 0     |
|                     | log Kp (cm/s)  | -9.94 | -9.3 | -8.95 | -9.1 | -9.23 | -9.12 | -8.83 | -8.95 | -10.01 | -9.25 |
| Drug-likeness       | LVs            | 1     | 0    | 0     | 2    | 0     | 0     | 0     | 0     | 2      | 0     |
|                     | GVs            | 1     | 0    | 0     | 0    | 0     | 0     | 0     | 0     | 1      | 1     |
|                     | VVs            | 1     | 2    | 1     | 1    | 1     | 1     | 1     | 1     | 1      | 1     |
|                     | EVs            | 1     | 1    | 1     | 1    | 1     | 1     | 1     | 1     | 1      | 1     |
|                     | MVs            | 2     | 1    | 1     | 2    | 1     | 1     | 1     | 1     | 3      | 1     |
|                     | BS             | 0.55  | 0.55 | 0.11  | 0.11 | 0.11  | 0.11  | 0.11  | 0.11  | 0.11   | 0.11  |
| Medicinal chemistry | PAINS alerts   | 0     | 0    | 0     | 0    | 0     | 0     | 0     | 0     | 0      | 0     |
|                     | Brenk alerts   | 5     | 5    | 5     | 4    | 4     | 5     | 4     | 4     | 5      | 5     |
|                     | LL             | 2     | 2    | 2     | 1    | 2     | 2     | 2     | 1     | 2      | 1     |
|                     | SA (1-10)      | 5.53  | 5.81 | 5.53  | 5.16 | 5.72  | 5.5   | 5.42  | 5.27  | 5.63   | 5.35  |

Note: \*Compound with positive ADME properties, MW- molecular weight, MR- molecular refractivity, TPSA- topological polar surface area, (H-ba)- Hydrogen bond acceptors, (H-bd)- Hydrogen bond donors, S- Soluble, Moderate soluble- M, Very soluble- V, CYP inhibitors - CYP1A2/CYP2C19/ CYP2C9/CYP2D6/ CYP3A4, LVs- Lipinski violations, GVs – Ghose Violations, VVs – Veber Violations, EVs – Egan Violations, MVs – Muegge Violations, BS- Bioavailability score, LL- Lead-likeness violations, SA- Synthetic accessibility.

**Table S5.** Biological activity of selected GSL compounds.

| GBN        |                               | GNA        |                               | GNS        |                               | GTL        |                               | SIN        |                               |
|------------|-------------------------------|------------|-------------------------------|------------|-------------------------------|------------|-------------------------------|------------|-------------------------------|
| Pa>0,<br>7 | Activity<br>Predicted         | Pa>0,<br>7 | Activity<br>Predicted         | Pa>0,<br>7 | Activity Predicted            | Pa>0,<br>7 | Activity Predicted            | Pa>0,<br>7 | Activity Predicted            |
| 0,975      | Chemopreventive               | 0,964      | Chemopreventive               | 0,956      | Benzoate-CoA ligase inhibitor | 0,959      | Benzoate-CoA ligase inhibitor | 0,964      | Chemopreventive               |
| 0,956      | Benzoate-CoA ligase inhibitor | 0,956      | Benzoate-CoA ligase inhibitor | 0,917      | Sugar-phosphatase inhibitor   | 0,945      | Chemopreventive               | 0,960      | Benzoate-CoA ligase inhibitor |

|       |                                             |       |                                             |       |                                                                 |       |                                                                 |       |                                                                 |
|-------|---------------------------------------------|-------|---------------------------------------------|-------|-----------------------------------------------------------------|-------|-----------------------------------------------------------------|-------|-----------------------------------------------------------------|
| 0,927 | Anticarcinogenic                            | 0,927 | Anticarcinogenic                            | 0,909 | Chemopreventive                                                 | 0,922 | Sugar-phosphatase inhibitor                                     | 0,939 | Antineoplastic                                                  |
| 0,913 | Apoptosis agonist                           | 0,924 | Apoptosis agonist                           | 0,869 | Protein-Npi-phosphohistidine-sugar phosphotransferase inhibitor | 0,901 | Antineoplastic                                                  | 0,916 | Sugar-phosphatase inhibitor                                     |
| 0,903 | Sugar-phosphatase inhibitor                 | 0,893 | Sugar-phosphatase inhibitor                 | 0,866 | Anticarcinogenic                                                | 0,884 | Protein-Npi-phosphohistidine-sugar phosphotransferase inhibitor | 0,906 | Anticarcinogenic                                                |
| 0,887 | Antineoplastic                              | 0,878 | Antineoplastic                              | 0,866 | Apoptosis agonist                                               | 0,828 | Anticarcinogenic                                                | 0,908 | Apoptosis agonist                                               |
| 0,869 | Beta-adrenergic receptor kinase inhibitor   | 0,867 | G-protein-coupled receptor kinase inhibitor | 0,831 | Beta-mannosidase inhibitor                                      | 0,819 | Exoribonuclease II inhibitor                                    | 0,880 | Protein-Npi-phosphohistidine-sugar phosphotransferase inhibitor |
| 0,869 | G-protein-coupled receptor kinase inhibitor | 0,867 | Beta-adrenergic receptor kinase inhibitor   | 0,810 | Exoribonuclease II inhibitor                                    | 0,817 | IgA-specific metalloendopeptidase inhibitor                     | 0,872 | G-protein-coupled receptor kinase inhibitor                     |

\* Pa- Probability of active

**Table S6.** Homology-modelled target structures assessments

| Targets               | CAT    | GPX    | SOD    |
|-----------------------|--------|--------|--------|
| MolProbity Score      | 1.15   | 0.91   | 1.95   |
| Clash Score           | 0.51   | 0.33   | 1.45   |
| Ramachandran Favoured | 96.27% | 98.92% | 94.64% |
| Rotamer Outliers      | 1.98%  | 2.42%  | 8.33%  |
| C-Beta Deviations     | 10     | 4      | 4      |

|                   |           |           |           |
|-------------------|-----------|-----------|-----------|
| Cis Prolines      | 4/144     | 8/48      | 4/40      |
| QMEANDisco Global | 0.90±0.05 | 0.86±0.05 | 0.87±0.05 |
| QMEAN             | -0.82     | -1.21     | -0.95     |
| C $\beta$         | -0.32     | -1.67     | -0.96     |
| All-atom          | -0.86     | 0.16      | 0.28      |
| Solvation         | -1.44     | -1.09     | 0.81      |
| Torsion           | -0.26     | -0.59     | -1.05     |
| G-Factors         | 0.12      | -0.03     | 0.23      |

Note: Ramachandra plot analysis with 118 structures of resolution of at least 2.0 Å with R-factor  $\leq$  20.0 would be a good model and expected above 90% score in the most favored regions. G-factors give an unusual (-0.5) and highly unusual (-1.0) measure values while below it.

**Table S7.** Target's binding site predicted for remodeled structure of CAT, GPX and SOD

| Target | Pockets | Probability | Center_X | Center_Y | Center_Z | Residue_Ids                                                                                                                                                                                                                                                                                                                                           |
|--------|---------|-------------|----------|----------|----------|-------------------------------------------------------------------------------------------------------------------------------------------------------------------------------------------------------------------------------------------------------------------------------------------------------------------------------------------------------|
| CAT    | 1       | 0.991       | 16.1178  | 39.2279  | 54.6048  | B_112 B_114 B_131 B_133 B_146 B_147 B_148 B_153 B_158 B_161 B_216 B_217 B_218 B_299 B_332 B_334 B_350 B_353 B_354 B_357 B_358 B_361 B_362 B_365 B_72 B_73 B_74 B_75 C_61 C_65                                                                                                                                                                         |
|        | 2       | 0.99        | 25.0904  | 7.9685   | 61.187   | B_61 B_65 C_112 C_114 C_116 C_133 C_146 C_147 C_148 C_153 C_158 C_161 C_165 C_217 C_218 C_299 C_334 C_350 C_354 C_357 C_358 C_361 C_362 C_365 C_72 C_73 C_74 C_75 A_112 A_114 A_116 A_131 A_132 A_133 A_146 A_147 A_148 A_153 A_158 A_161 A_216 A_217 A_218 A_299 A_334 A_350 A_353 A_354 A_357 A_358 A_361 A_362 A_365 A_72 A_73 A_74 A_75 D_61 D_65 |
|        | 3       | 0.99        | 7.8159   | 41.1275  | 84.8595  | A_61 A_65 D_112 D_114 D_131 D_133 D_146 D_147 D_148 D_153 D_158 D_161 D_217 D_218 D_299 D_332 D_334 D_350 D_354 D_357 D_358 D_361 D_362 D_365 D_72 D_73 D_74 D_75                                                                                                                                                                                     |
|        | 4       | 0.989       | 30.9875  | 18.1448  | 90.0106  | A_363 A_364 A_365 A_366 A_367 A_368 A_391 A_392 A_66 A_69 A_70 B_363 B_364 B_366 B_367 B_368 B_391 B_392 B_66 B_70 C_360 C_363 C_364 C_365 C_366 C_367 C_368 C_391 C_392 C_66 C_70 D_363 D_364 D_366 D_367 D_368 D_391 D_392 D_66 D_70                                                                                                                |
|        | 5       | 0.879       | 19.2215  | 26.7619  | 72.5984  | D_149 D_151 D_152 D_194 D_198 D_201 D_203 D_212 D_213 D_215 D_233 D_235 D_237 D_242 D_282 D_302 D_303 D_304 D_305 D_442 D_445 D_446 D_450 D_451                                                                                                                                                                                                       |
|        | 6       | 0.83        | 40.7177  | 12.6888  | 106.581  | C_149 C_151 C_194 C_198 C_201 C_203 C_211 C_212 C_213 C_215 C_233 C_235 C_237 C_242 C_244 C_282 C_302 C_303 C_304 C_305 C_442 C_445 C_446 C_450 C_451 C_455                                                                                                                                                                                           |
|        | 7       | 0.828       | 27.1335  | -7.5347  | 49.5106  | A_120 A_324 A_325 A_326 A_330 A_67 A_68 A_69 A_71 A_76 A_77 A_78 C_388 C_389 C_403 D_119 D_166 D_169 D_170 D_172 D_175 D_71                                                                                                                                                                                                                           |
|        | 8       | 0.81        | 14.2041  | 24.1783  | 90.1152  |                                                                                                                                                                                                                                                                                                                                                       |



|     |    |       |         |          |         |                                                                                                                                                             |
|-----|----|-------|---------|----------|---------|-------------------------------------------------------------------------------------------------------------------------------------------------------------|
| GPX | 9  | 0.81  | 13.2199 | 21.5111  | 56.2891 | A_388 A_389 A_403 B_119 B_166 B_169 B_170 B_171 B_172 B_175 B_71 C_120 C_325 C_326 C_330 C_67 C_68 C_69 C_71 C_76 C_77 C_78                                 |
|     | 10 | 0.797 | 24.4374 | 36.0115  | 88.0469 | A_119 A_166 A_169 A_170 A_172 A_175 A_71 B_388 B_389 B_403 D_120 D_324 D_325 D_326 D_330 D_67 D_68 D_69 D_71 D_76 D_77 D_78                                 |
|     | 11 | 0.773 | -3.2192 | 52.0554  | 97.3278 | A_151 A_152 A_194 A_198 A_203 A_213 A_215 A_235 A_237 A_242 A_282 A_302 A_303 A_304 A_305 A_310 A_442 A_445 A_446 A_450 A_451                               |
|     | 12 | 0.772 | 29.6372 | 23.8788  | 56.387  | B_120 B_324 B_325 B_326 B_330 B_67 B_68 B_69 B_71 B_76 B_77 C_119 C_166 C_169 C_170 C_171 C_172 C_175 C_71 D_388 D_389 D_403                                |
|     | 13 | 0.709 | 39.141  | 25.4802  | 69.9303 | B_30 B_59 B_63 D_363 D_368 D_369 D_371 D_372 D_377 D_378 D_381 D_383 D_385 D_387 D_388 D_394 D_395 D_396 D_397 D_398                                        |
|     | 14 | 0.697 | 13.7156 | 50.0694  | 37.5749 | B_149 B_151 B_194 B_198 B_203 B_213 B_215 B_233 B_235 B_237 B_242 B_282 B_302 B_304 B_305 B_442 B_445 B_446 B_450                                           |
|     | 15 | 0.674 | 12.7438 | 26.5794  | 43.2329 | B_117 B_118 B_119 B_121 B_122 B_123 B_126 B_127 B_128 B_168 B_170 B_177 B_178 B_179 B_182 B_186 B_199 B_200 B_254 B_466 C_121 C_123 C_254 C_255 C_258 C_259 |
|     | 16 | 0.651 | 1.1766  | 26.5863  | 68.946  | A_363 A_368 A_369 A_370 A_371 A_372 A_377 A_381 A_383 A_385 A_387 A_388 A_393 A_395 A_396 A_397 A_398 C_30 C_59 C_63                                        |
|     | 17 | 0.641 | 11.355  | 10.7337  | 78.6126 | A_30 A_59 A_63 C_363 C_368 C_370 C_371 C_372 C_377 C_378 C_383 C_385 C_387 C_389 C_393 C_394 C_395 C_397 C_398                                              |
|     | 18 | 0.598 | 27.993  | 43.4802  | 73.7471 | B_363 B_368 B_369 B_370 B_371 B_372 B_377 B_383 B_385 B_387 B_388 B_389 B_395 B_397 B_398 D_30 D_59 D_63                                                    |
|     | 1  | 0.478 | 64.4875 | 10.1763  | -7.5886 | A_102 A_155 A_157 A_158 A_159 A_160 A_162 A_163 A_175 A_176 A_194 A_195 A_196 A_67 A_68 A_69 A_70                                                           |
|     | 2  | 0.478 | 40.0565 | -10.1763 | -7.5886 | B_102 B_155 B_157 B_158 B_159 B_160 B_162 B_163 B_175 B_176 B_194 B_195 B_196 B_67 B_68 B_69 B_70                                                           |
|     | 3  | 0.478 | 64.4875 | -10.1763 | 7.5886  | C_102 C_155 C_157 C_158 C_159 C_160 C_162 C_163 C_175 C_176 C_194 C_195 C_196 C_67 C_68 C_69 C_70                                                           |
|     | 4  | 0.478 | 40.0565 | 10.1763  | 7.5886  | D_102 D_155 D_157 D_158 D_159 D_160 D_162 D_163 D_175 D_176 D_194 D_195 D_196 D_67 D_68 D_69 D_70                                                           |
|     | 5  | 0.43  | 67.5096 | 2.0855   | 7.2433  | A_101 A_104 A_106 A_132 A_133 A_134 A_165 A_97 A_98 C_100 C_101 C_102 C_118 C_67                                                                            |
|     | 6  | 0.43  | 37.0344 | -2.0855  | 7.2433  | B_101 B_104 B_106 B_132 B_133 B_134 B_165 B_97 B_98 D_100 D_101 D_102 D_118 D_67                                                                            |
|     | 7  | 0.43  | 67.5096 | -2.0855  | -7.2433 | A_100 A_101 A_102 A_118 A_67 C_101 C_104 C_106 C_132 C_133 C_134 C_165 C_97 C_98                                                                            |
|     | 8  | 0.43  | 37.0344 | 2.0855   | -7.2433 | B_100 B_101 B_102 B_118 B_67 D_101 D_104 D_106 D_132 D_133 D_134 D_165 D_97 D_98                                                                            |
| SOD | 1  | 0.878 | 17.8575 | -7.4597  | 43.2137 | A_162 A_30 A_31 A_34 A_35 A_38 A_67 A_68 B_117 B_118 B_119 B_121 B_163 B_166 B_172 B_174 B_175                                                              |

|   |       |          |          |         |                                                                                                      |
|---|-------|----------|----------|---------|------------------------------------------------------------------------------------------------------|
| 2 | 0.878 | -17.8575 | 7.4597   | 43.2137 | C_162 C_30 C_31 C_34 C_35 C_38 C_67 C_68 D_117 D_118 D_119 D_121 D_163 D_166 D_172 D_174 D_175       |
| 3 | 0.877 | 18.8031  | -1.0927  | 59.4645 | A_117 A_118 A_119 A_120 A_121 A_161 A_163 A_166 A_172 A_174 B_162 B_30 B_31 B_34 B_35 B_38 B_67 B_68 |
| 4 | 0.877 | -18.8031 | 1.0927   | 59.4645 | C_117 C_118 C_119 C_120 C_121 C_161 C_163 C_166 C_172 C_174 D_162 D_30 D_31 D_34 D_35 D_38 D_67 D_68 |
| 5 | 0.076 | 9.7182   | -10.8646 | 70.9393 | B_3 B_72 B_73 B_76 D_53 D_55                                                                         |
| 6 | 0.076 | -9.7182  | 10.8646  | 70.9393 | B_53 B_55 D_3 D_72 D_73 D_76                                                                         |

---
